# Supplementary material
Source: PubMed Central journal article supplement (PMC3433587)
Supplement: NIHMS398348-supplement-1_si_001.pdf [file NIHMS398348-supplement-1_si_001.pdf]

---

# Ultrasound Enhanced Matrix Metalloproteinase-9 Triggered Release of Contents from Echogenic Liposomes

*Rahul Nahire,<sup>#</sup> Shirshendu Paul,<sup>§</sup> Michael D. Scott,<sup>#</sup> Raushan K. Singh,<sup>†</sup> Wallace W. Muhonen,<sup>‡</sup>  
John Shabb,<sup>‡</sup> Kara N. Gange,<sup>∞</sup> D. K. Srivastava,<sup>†</sup> Kausik Sarkar,<sup>§<sup>⊥</sup></sup> and Sanku Mallik<sup>#\*</sup>*

<sup>#</sup> Department of Pharmaceutical Sciences, North Dakota State University, Fargo, North Dakota 58108.

<sup>†</sup> Department of Chemistry and Biochemistry, North Dakota State University, Fargo, North Dakota 58108.

<sup>‡</sup> Department of Biochemistry, University of North Dakota, Grand Forks, North Dakota 58202

<sup>§</sup> Department of Mechanical Engineering, University of Delaware, Newark, Delaware 19716

<sup>⊥</sup> Department of Mechanical and Aerospace Engineering, George Washington University, Washington, District of Columbia 20052

<sup>∞</sup> Department of Health, Nutrition and Exercise Sciences, North Dakota State University, Fargo, North Dakota 58108

**Table of Contents:**

|                                                                       |     |
|-----------------------------------------------------------------------|-----|
| I. Optical microscopy of Echogenic Liposomes.....                     | 2   |
| II. Quenching effect of ELIPs on carboxyfluorescein fluorescence..... | 3-5 |

**I. Optical Microscopy:**

To support particle size distribution findings of DLS Zeta Sizer instrument, we observed ELIPs under an optical microscope (Olympus IX81<sup>®</sup> motorized inverted microscope). The ELIPs contained 1 mol% 1,2-dipalmitoyl-*sn*-glycero-3-phosphoethanolamine-N-(lissamine rhodamine B sulfonyl) (ammonium salt) and all the remaining procedure was followed as described in main manuscript. A glass slide was used and 30-50  $\mu$ L of liposomal solution (0.2 mg/mL) was added. A coverslip then placed on to the top of the sample. Care was taken while putting coverslip to avoid entrapment any air bubbles and extra solution coming out from the coverslip was wiped using a tissue paper. All images were viewed using 60X objective and captured using CellSens Standard software (version 1.6).

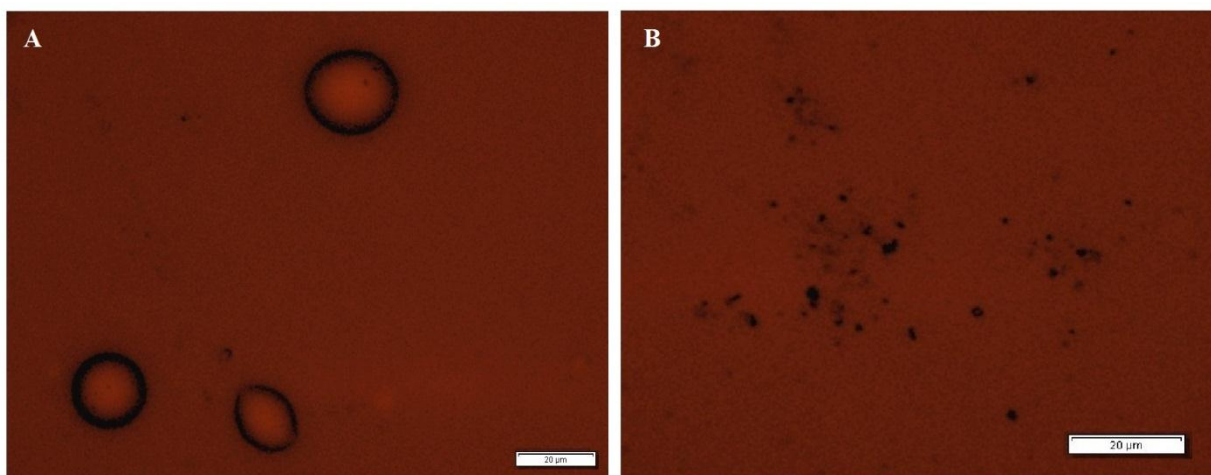

**Figure S1.** Optical microscopic images of ELIPs observed using 60X lens.

## II. Quenching effect of ELIPs on carboxyfluorescein fluorescence:

To study effect of echogenic liposomes on the fluorescence of carboxyfluorescein, two batches of liposomes were prepared (regular liposomes and echogenic liposomes without encapsulation of dye) following the same protocol as described in main manuscript. Reconstituted liposomal solutions (0.02 mg/mL of total lipid) were then incubated in 0.5  $\mu\text{M}$  carboxyfluorescein in 25 mM HEPES buffer pH 8 with added  $\text{Ca}^{2+}$  and  $\text{Zn}^{2+}$  for an hour. The fluorescence emission was monitored (excitation at 480 nm) from 350 nm to 750 nm at different time intervals (0 min, 30 min and 60 min; Figures S2 – S4).

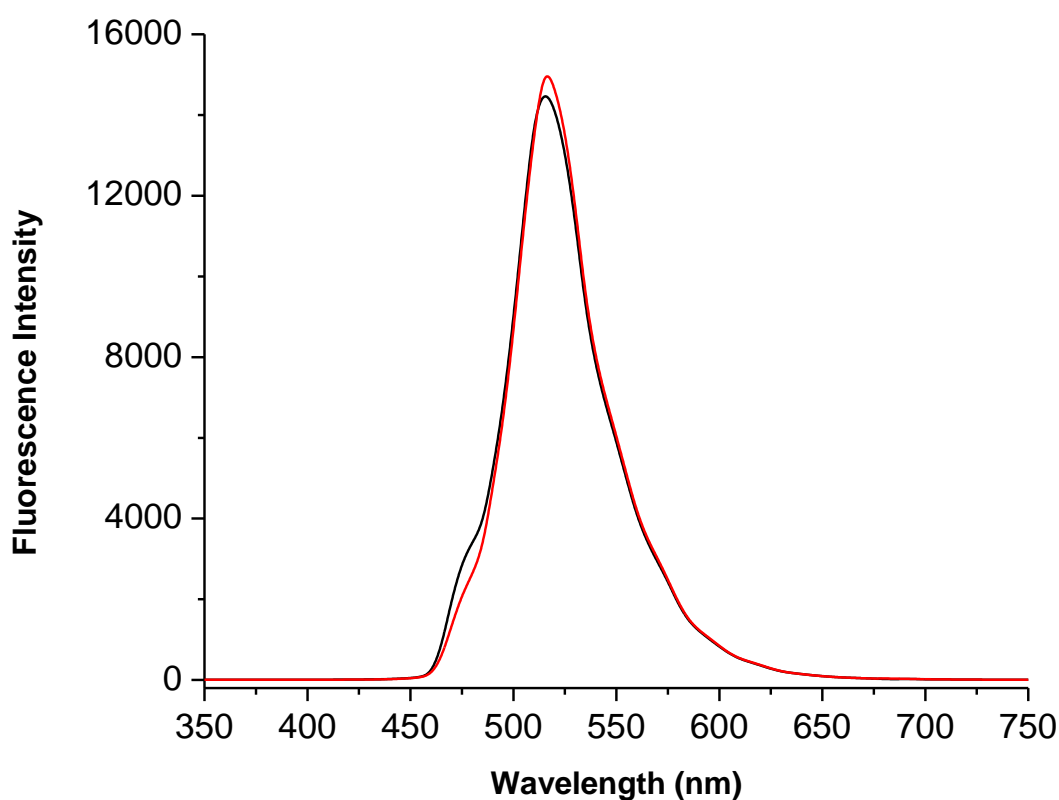

**Figure S2.** Initial ( $t = 0$  min) emission spectra for carboxyfluorescein incubated with regular liposomes (black trace) and ELIPs (red trace).

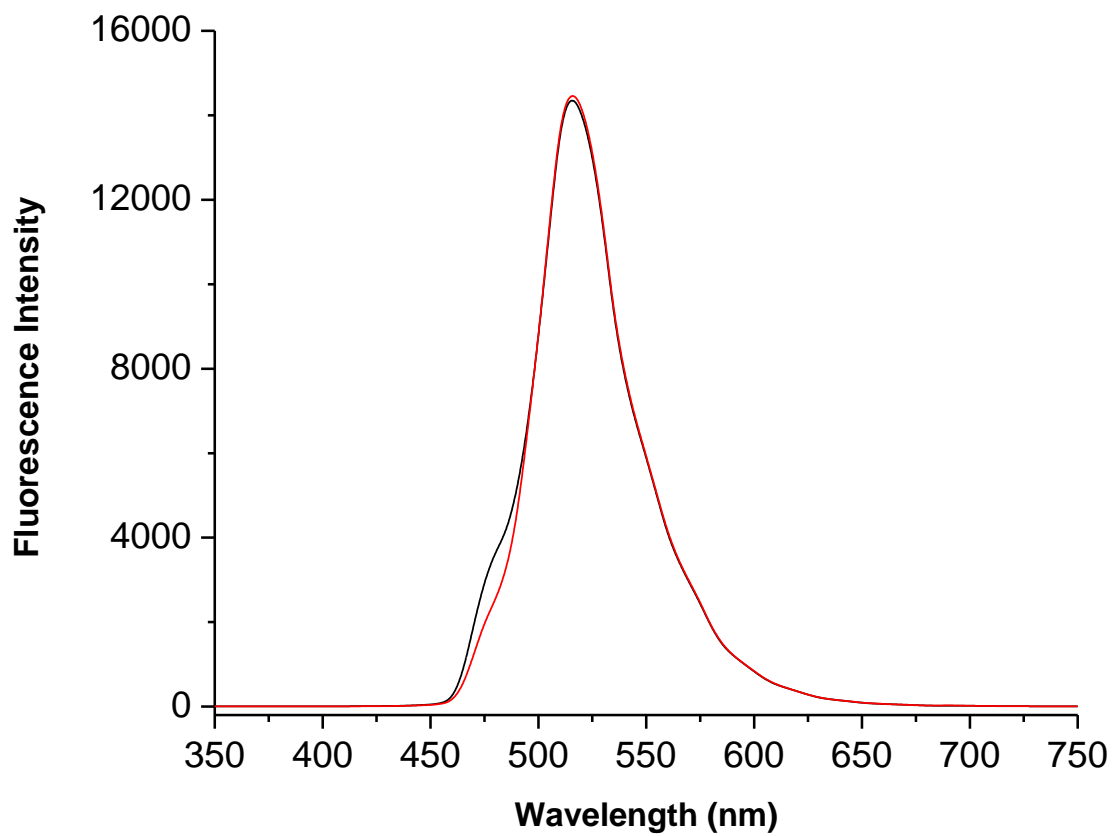

**Figure S3.** Emission spectra for carboxyfluorescein incubated with regular liposomes (black trace) and ELIPs (red trace) after 30 minutes.

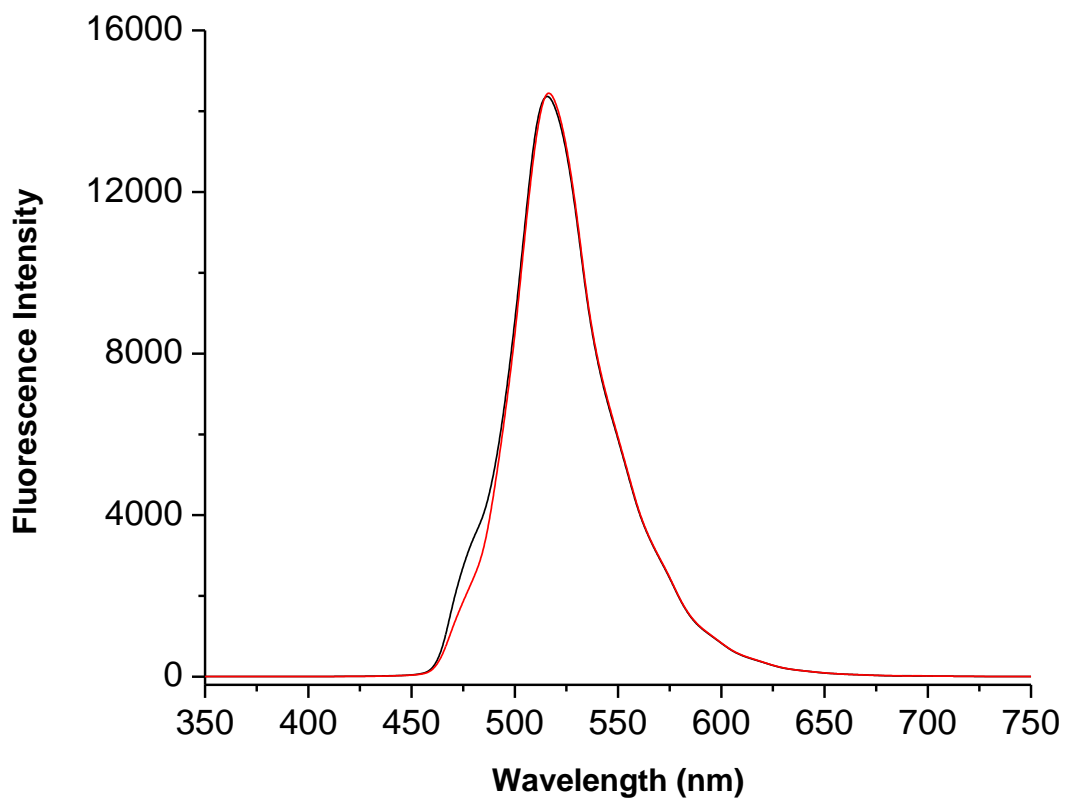

**Figure S4.** Emission spectra for carboxyfluorescein incubated with regular liposomes (black trace) and ELIPs (red trace) after 60 minutes.
